# Supplementary material for: Acute injury to the mouse carotid artery provokes a distinct healing response
Source: Frontiers journal article supplement (doi:10.3389/fphys.2023.1125864), 2023-02-07
Supplement: Data_Sheet_1.PDF [file Data_Sheet_1.PDF]

# Supplementary Figure 1

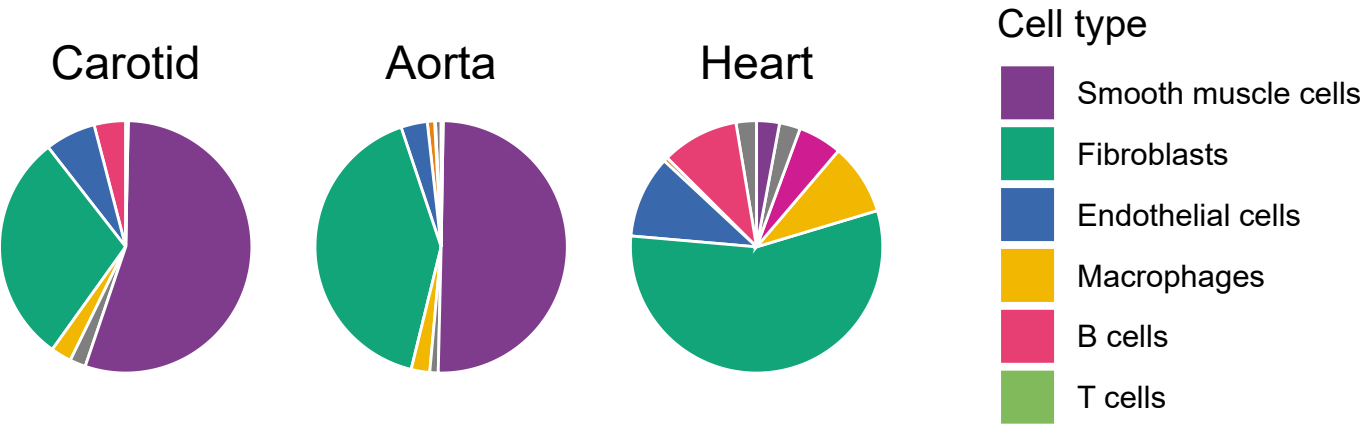

**Supplementary Figure 1 | Cell type proportions in uninjured carotid, aortic and cardiac tissues**  
Proportion of each cell type present in scRNA-seq of uninjured carotid, aortic and cardiac tissues.

## Supplementary Figure 2

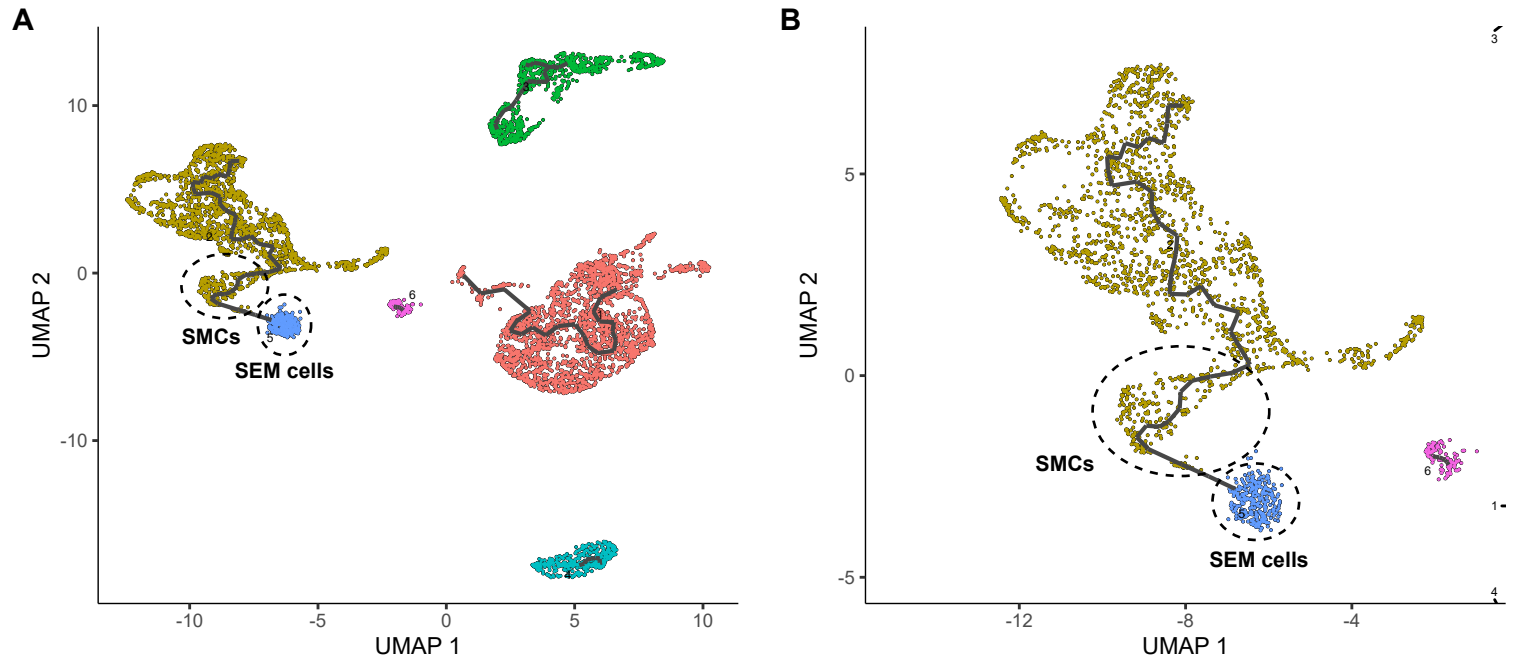

**Supplementary Figure 2 | Trajectory analysis of carotid injury (A)** Trajectories (black) built by *monocle3* over single cells present in the response to acute carotid injury. **(B)** Trajectory present between smooth muscle cell and SEM cell populations.

# Supplementary Figure 3

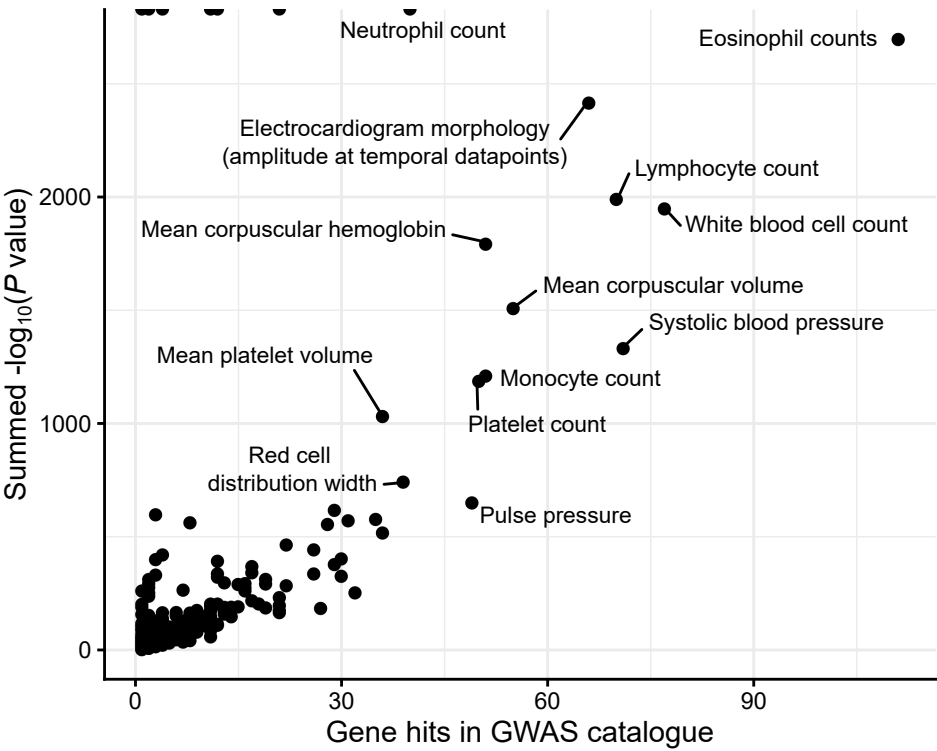

**Supplementary Figure 3 | Association of SEM marker genes to human traits.** Human homologues of SEM marker genes identified in mice were used to query the NHGRI-EBI GWAS Catalogue, and resulting hits were stratified by total genes assigned and the sum of log-transformed **P** values across all hits.
